# Supplementary material for: Pelvic organ prolapse and uterine preservation: a survey of female gynecologists (POP-UP survey)
Source: Springer Nature journal article supplement (doi:10.1186/s12905-020-01105-3), 2020-10-27
Supplement: MOESM1 [file 18526088]

## Pelvic Organ Prolapse and Uterine Preservation: A survey of female gynecologists (POP-UP survey)

### English translation of survey questions:

#### Questionnaire

- I. Country of practice? .....
- II. Type of hospital you are affiliated to?
- A University hospital /academic type
  - B Teaching hospital
  - C District hospital
  - D Regional / local hospital
- III. What is your age ..... years
- IV. What is your area of special interest /subspecialization within OB/GYN
- A materno – fetal medicine or antenatal care or obstetrical ultrasound
  - B oncogynaecology
  - C reproductive medicine
  - D urogynaecology
  - E gynaecological endoscopy
  - F gynaecological endocrinology
  - G juvenile and adolescent gynaecology
  - H gynaecological sexuology
  - I other. Please specify: .....
  - J I have no subspecialty (e.g. working in a small hospital, ...)
- V. Have you completed your family
- A Not at all
  - B Partially, I still plan to have a baby in the future
  - C I probably have, but cannot say definitely
  - D I definitely have

Please, answer the following questions based on this scenario.

*You are a health postmenopausal woman without any prior major gynaecological surgery. You are suffering from a significant pelvic organ prolapse involving all compartments (anterior, apical, posterior).*

VI. What is the likelihood that you would use each of the following options to help you decide the best treatment for you:

|                         | Definitely | Likely | Not likely | Not at all |
|-------------------------|------------|--------|------------|------------|
| a urogynecologist       |            |        |            |            |
| an oncogynecologist     |            |        |            |            |
| another colleague       |            |        |            |            |
| your life partner       |            |        |            |            |
| your female friend      |            |        |            |            |
| professional literature |            |        |            |            |
| internet, TV, media.    |            |        |            |            |

VII. What is the likelihood that you would opt for each of these options as a management for your POP.

|                                      | Definitely | Likely | Not likely | Not at all |
|--------------------------------------|------------|--------|------------|------------|
| No treatment                         |            |        |            |            |
| Physiotherapy                        |            |        |            |            |
| Pesary                               |            |        |            |            |
| Vaginal wall repair                  |            |        |            |            |
| Sacrospinous fixation                |            |        |            |            |
| High uterosacral ligament suspension |            |        |            |            |
| Transvaginal mesh                    |            |        |            |            |
| Sacrocolpopexy                       |            |        |            |            |
| Colpocleisis                         |            |        |            |            |
| Manchester repair                    |            |        |            |            |

VIII. Do you believe that uterus is important for your sense of self?

| Definitely | Likely | Not likely | Not at all |
|------------|--------|------------|------------|
|            |        |            |            |

IX. Regarding uterine sparing or concomitant hysterectomy at the time of POP surgery, what is the likelihood that you would choose the following in case all surgical options were equally effective

|                            | Definitely | Likely | Not likely | Not at all |
|----------------------------|------------|--------|------------|------------|
| Total hysterectomy         |            |        |            |            |
| Supracervical hysterectomy |            |        |            |            |
| Uterus sparing surgery     |            |        |            |            |

X. If you knew that uterine sparing surgery might have a slightly inferior anatomical outcome, what is the likelihood that you would choose the following

|                            | Definitely | Likely | Not likely | Not at all |
|----------------------------|------------|--------|------------|------------|
| Total hysterectomy         |            |        |            |            |
| Supracervical hysterectomy |            |        |            |            |
| Uterus sparing surgery     |            |        |            |            |

XI. In your opinion, would a concomitant hysterectomy have a negative impact on:

|                               | Definitely | Likely | Not likely | Not at all |
|-------------------------------|------------|--------|------------|------------|
| Sense of femininity           |            |        |            |            |
| Body image                    |            |        |            |            |
| Body weight                   |            |        |            |            |
| Vaginal moisture/lubrication  |            |        |            |            |
| Sex drive                     |            |        |            |            |
| Partner's sex drive           |            |        |            |            |
| Partner's sexual satisfaction |            |        |            |            |

XII. What degree of importance will the following factors have on your decision to have or refuse hysterectomy at the time of POP surgery

|                                    | Very important | Important | Not important |
|------------------------------------|----------------|-----------|---------------|
| Professional's opinion             |                |           |               |
| Partner's opinion                  |                |           |               |
| Female family member opinion       |                |           |               |
| Wanting to keep all healthy organs |                |           |               |
| Desire to end menstrual periods    |                |           |               |
| Eliminating need for contraception |                |           |               |

XII. How important are the following factors for you when making a decision about agreeing to or refusing a hysterectomy at the time of POP surgery [2]

|                                | Very important | Important | Not important |
|--------------------------------|----------------|-----------|---------------|
| Risk of surgical complications |                |           |               |
| Pain after surgery             |                |           |               |
| Mood/emotional state           |                |           |               |
| Fertility                      |                |           |               |
| Femininity                     |                |           |               |
| Sex drive                      |                |           |               |
| Sexual satisfaction            |                |           |               |
| Orgasm                         |                |           |               |
| Vaginal lubrication            |                |           |               |
| Relationship                   |                |           |               |
| Partner's perception           |                |           |               |
| Partner's sex drive            |                |           |               |
| Partner's sexual satisfaction  |                |           |               |

XIV. Here are some lifetime cancer risks in a woman's life span:

- 1 in 41 women will be diagnosed with uterine cancer during their lifetime
- 1 in 135 women will be diagnosed with cervical cancer during their lifetime.
- 1 in 8 women will be diagnosed with breast cancer during their lifetime
- 1 in 19 women will be diagnosed with bowel cancer during their lifetime
- 1 in 110 women will be diagnosed with bladder cancer during their lifetime
- 1 in 135 women will be diagnosed with stomach cancer during their lifetime

Knowing these risks and knowing the potential of screening, initial signs of cervical and uterine cancer altogether with its curability, please answer the following questions:

XIVa. Regarding uterine sparing or concomitant hysterectomy at the time of POP surgery, what is the likelihood that you would choose the following in case all surgical options were equally effective

|                            | Definitely | Likely | Not likely | Not at all |
|----------------------------|------------|--------|------------|------------|
| Total hysterectomy         |            |        |            |            |
| Supracervical hysterectomy |            |        |            |            |
| Uterus sparing surgery     |            |        |            |            |

XIVb. If you knew that uterine sparing surgery might have a slightly inferior anatomical outcome, what is the likelihood that you would choose the following

|                            | Definitely | Likely | Not likely | Not at all |
|----------------------------|------------|--------|------------|------------|
| Total hysterectomy         |            |        |            |            |
| Supracervical hysterectomy |            |        |            |            |
| Uterus sparing surgery     |            |        |            |            |

**Bibliography:**

1. Korbly NB, Kassis NC, Good MM, Richardson ML, Book NM, Yip S, Saguan D, Gross C, Evans J, Lopes VV, Harvie HS, Sung VW. Patient preferences for uterine preservation and hysterectomy in women with pelvic organ prolapse. *Am J Obstet Gynecol.* 2013 Nov;209(5):470.e1-6. doi: 10.1016/j.ajog.2013.08.003.
2. Frick AC, Barber MD, Paraiso MF, Ridgeway B, Jelovsek JE, Walters MD. Attitudes toward hysterectomy in women undergoing evaluation for uterovaginal prolapse. *Female Pelvic Med Reconstr Surg.* 2013 Mar-Apr;19(2):103-9. doi: 10.1097/SPV.0b013e31827d8667.
3. <http://www.cancerresearchuk.org>
